1 **Title**

2 • **Visual Cortical Area MT is Required for Development of the Dorsal**

3 **Stream and Associated Visuomotor Behaviours**

4 • The Early Life Contribution of MT to Visuomotor Behaviour

5

6 **Authors**

7 William C. Kwan<sup>1</sup>†, Chia-Kang Chang<sup>1</sup>†, Hsin-Hao Yu<sup>2</sup>, Inaki C. Mundinano<sup>1</sup>, Dylan M.

8 Fox<sup>1</sup>, Jihane Homman-Ludiye<sup>1</sup>, James A. Bourne<sup>1</sup>\*

9

10 **Affiliations**

11 <sup>1</sup> Australian Regenerative Medicine Institute, Monash University, Clayton, VIC 3800, Australia.

12 <sup>2</sup> Department of Physiology, Monash University, Clayton, VIC 3800, Australia.

13 † Authors contributed equally

14 \*Corresponding Author email: James.Bourne@monash.edu

15

16

17

18

19

20

21

22 **Abstract**

23

24 The middle temporal (MT) area of the extrastriate visual cortex has long been studied in  
25 adulthood for its distinctive physiological properties and function as a part of the dorsal stream,  
26 yet interestingly possesses a similar maturation profile as the primary visual cortex (V1). Here we  
27 examined whether an early-life lesion of MT altered the dorsal stream development and the  
28 behavioural precision of reaching to grasp sequences. We observed permanent changes in the  
29 anatomy of cortices associated with both reaching (PE and MIP) and grasping (AIP), as well as in  
30 reaching and grasping behaviours. In addition, we observed a significant impact on the anatomy  
31 of V1 and the direction sensitivity of V1 neurons in the lesion projection zone. These findings  
32 indicate that area MT is a crucial node for the development of the primate vision, impacting both  
33 V1 and areas in the dorsal visual pathway known to mediate visually guided manual behaviours.

34

35 **Teaser**

36 The early life loss of visual area MT leads to significant anatomical, physiological and  
37 behavioural changes.

38

39 **MAIN TEXT**

40

41 **Introduction**

42 Vision relies on a multiplicity of areas within the brain to communicate synergistically in order  
43 to produce an accurate percept. The seminal works of Goodale & Milner(1) and Ungerleider &  
44 Mishkin(2) proposed the existence of two neocortical pathways which have a dichotomous visual  
45 functional specialisation. More specifically, the dorsal stream pathway is involved in perceiving  
46 motion and “vision-for-action”, while the ventral stream pathway is associated with shape/ object  
47 perception and “vision-for-perception”. Central to the dorsal stream is the middle temporal (MT)  
48 area (**Fig. 1A, B**). Based on established anatomical markers of neural circuit maturation, area MT  
49 matures early and in parallel with primary sensory areas, including the primary visual cortex  
50 (V1)(3). Further, since the monosynaptic V1-MT connection is yet to be fully established during  
51 this process, the early maturation of MT is thought to be independent of V1 input(4). This  
52 knowledge, and the fact that MT has a first-order topographical map(5) and is directly recipient  
53 of thalamic connections(6, 7), supports the notion that it is a ‘primary-like’ area and serves as an  
54 anchor early in life to support establishment of the dorsal stream(8).

55

56 In adulthood, MT receives significant input directly and indirectly from V1(5, 9), and is  
57 interconnected with multiple dorsal stream extrastriate areas, including V3 and the dorsomedial  
58 (DM) area, anterior and lateral intraparietal areas (AIP and LIP) (10–13) and the frontal eye  
59 fields (FEF)(14, 15) (**Fig. 1A, B**). Area MT also has abundant connections with subcortical  
60 structures, including reciprocal connections with the medial portion of the inferior pulvinar(4, 7,  
61 16), and afferent projections from the koniocellular layers of the lateral geniculate nucleus  
62 (LGN) (6) and superior colliculus (11, 17, 18).

63

54 A substantial proportion of neurons within MT are highly tuned for direction(19, 20), a clear  
55 distinction from V1, suggesting that MT plays a central role in motion perception and integration  
56 of visual information. However, there are few studies which have interrogated how injury to MT  
57 impairs visual perception and global visual behaviour. Newsome and colleagues(21, 22)  
58 provided behavioural evidence of how MT contributes to motion perception following  
59 mechanical ablation of MT, while motion blindness/ akinetopsia has been observed clinically in a  
70 patient with bilateral MT injury(23, 24). Further, others have demonstrated that V2 direction  
71 tuning properties are dependent on MT(25).

72

73 In the phenomenon of blindsight, the extensive multiplexed circuitry of the dorsal stream, with a  
74 central component being area MT, has been long implicated as the neural substrate that affords  
75 the ability to perform specific visually-driven tasks in the absence of V1(26, 27). More specific  
76 investigation revealed that MT remains active when visual stimuli are presented within the  
77 scotoma(28, 29).

78

79 Few studies have considered the role of MT in the development of the dorsal stream and to the  
80 establishment of specific visuomotor behaviour but developmental studies have inferred that MT  
81 acts as the primary node the establishment of the dorsal stream(3, 30). Further, early-life lesions  
82 of the geniculostriate pathway have highlighted the conserved integrity of MT in both humans  
83 and monkeys (27, 31). Therefore, we hypothesised that an early-life lesion of MT will  
84 permanently perturb reaching to grasp behaviours and result in dysfunction of areas directly  
85 connected with MT.

86

87

88

39 **Results**

39 We used early postnatal ablations as a method to study the role MT would serve in the  
40 development of the visual cortex and visually-guided behaviours. At 6 weeks post-surgery, MRI  
41 T2-weighted images were acquired to validate unilateral biopsy punch ablation of MT in the 5  
42 neonatal (PD14) marmosets (**Fig. 1C**). Prior to lesion, the location of area MT was visualised in  
43 MRI images (T2-weighted) by a dorsal shift in layer 4 from adjacent areas (**Fig. 1C inset**).  
44 During the excision of MT tissue, particular care was taken to remove all 6 cortical layers while  
45 leaving the underlying white matter tract intact. When the animals subsequently reached young  
46 adulthood (>36 weeks) and underwent DTI scans for evaluation of effected cortices, another T2  
47 sequence was obtained to map the extent of the lesion (**Fig. 1B**). In these scans, we often  
48 observed that the lesion core had scar tissue and subtle degeneration of the underlying white  
49 matter had occurred. Following perfusion of the cerebral tissues, histological confirmation of the  
50 lesion was achieved with a Gallyas (myelin) silver stain (**Fig. 1D**), and the lesion was fully  
51 reconstructed to establish its topographical extent for each animal (**Fig. 1E**).  
52  
53

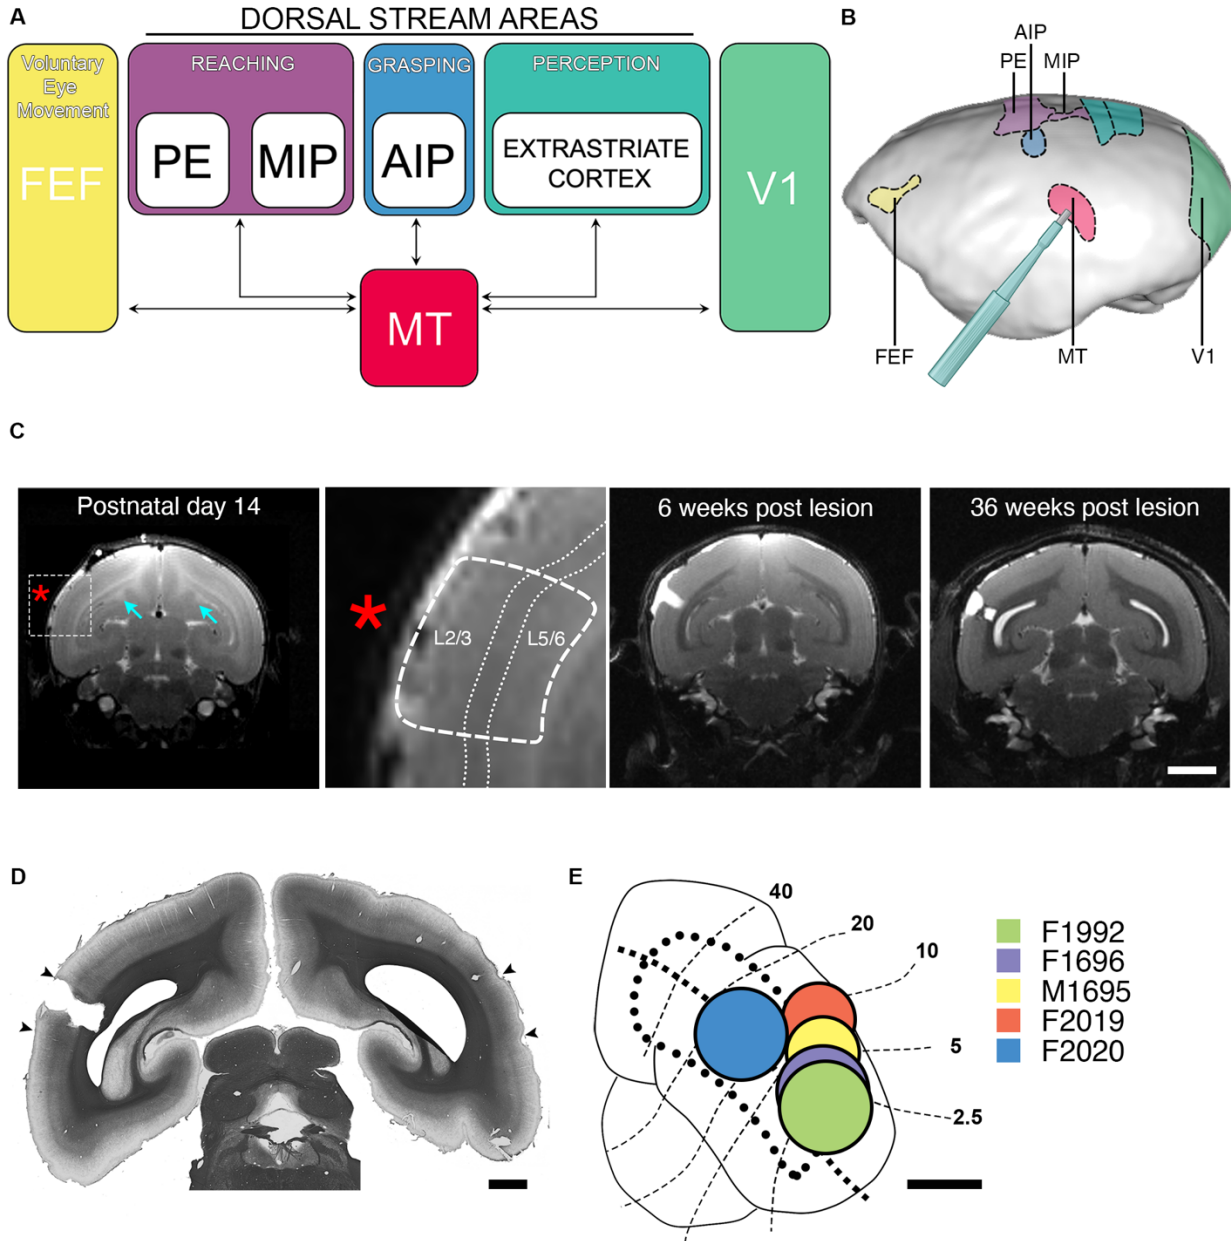

05 **Figure 1. Direct connectivity of middle temporal (MT) area of the visual cortex and**  
06 **unilateral early life lesion approach.**

07 **(A)** Wiring diagram detailing monosynaptic reciprocal connectivity of area MT and proposed  
08 behavioural function. **(B)** Lateral view of left hemisphere of marmoset cortical surface  
09 highlighting anatomical positioning of areas in **(A)**. **(C)** T2-weighted MRI of a marmoset brain at  
10 the level of parafoveal MT, which was targeted for ablation at PD14. MT was demarcated based  
11 on dorsal shift in the layer IV (left image, red asterisk and inset). In the anterior/posterior plane,  
12 the core of MT was denoted as when the most caudal aspect of the corpus callosum becomes  
13 visible (arrow). Further T2-weighted scans were conducted at 6 weeks and 1 year post-injury to  
14 confirm lesion location and also diffusion tractography imaging (DTI) for fractional anisotropy  
15 analysis (DTI results in **Fig. 4**, scale bar = 5mm). **(D)** Histological analysis with myelin silver  
16 staining for *ex vivo* demarcation of lesion (scale bar = 2mm) **(E)** Summary of the extent, and  
17 retinotopic relationship, of MT lesion in each lesioned animal (scale bar = 2mm). Details of the  
18 experimentation each animal underwent is further detailed in **Table 1**.

19

20 **The absence of MT during development perturbs reach and grasp kinematics as well as**  
21 **interaction with static and moving objects**

22 As MT neurons are highly tuned for direction and the perception of motion, we wanted to  
23 determine if accurate reward-driven visuomotor behaviour was still achievable following early-  
24 life loss of MT. To ensure adequate compliance with the task, we first trained the animals to enter  
25 a removable transport box on the home cage, which was then taken into the behaviour laboratory  
26 (**Fig. 2A**)(32). We employed naturalistic, goal orientated, reach and grasp tasks once neonatal MT  
27 lesion animals (PD14) had reached adulthood (>18 months). These were undertaken both  
28 statically (**Fig. 2B**) or upon a variable speed/ direction turntable (**Fig. 2b**). Each food retrieval  
29 trial was 2D video-captured (see camera; **Fig. 2A**), which allowed us to study the animal's  
30 proficiency in executing the task and the kinematics of the reach and grasp phases.

31  
32 Animals were first presented with a static task. The task involved presenting a food reward which  
33 was placed on a pedestal in front of the animal (**Fig 2B - D**). Food rewards were cut into two sizes  
34 of cuboid (*small*: ~5x5 mm face; and, *large*: ~10x10 mm face) and were first employed to  
35 determine if the object size would affect overall performance. No significant difference in  
36 retrieval performance was observed between the two sizes of fruit reward in both control and  
37 lesioned cohorts (ANCOVA  $F(1,52)=0.68, p=0.41$ )(Fig S1A, B). When examining the collective  
38 retrieval attempts of both sizes of the statically presented food reward, we found overall  
39 performance within the MT-lesioned group was significantly impaired when compared with  
40 controls (permutation test,  $p=0.04^*$ )(**Fig. 2E**). Further analysis of the reach and grasp kinematics  
41 revealed significant differences in hand preshaping and reaching behaviour. Specifically, during  
42 the preshaping phase, neonatal MT-lesioned animals exhibited a significantly larger maximum  
43 grip aperture than controls (permutation test,  $p=0.0037$ ) (**Fig. 2F**). Further characterisation of the  
44 behaviour revealed neonatal MT-lesioned animals exhibit a feedforward movement with greater



45 velocity (permutation test,  $p=0.04$ ) (**Fig. 2G**) and acceleration (permutation test,  $p=0.02$ )(**Fig. 2H**)  
46 when approaching the target object.

47

48 We further assessed whether a target object of different sizes may influence the animal's ability to  
49 pre-shape their hand. By plotting the object size against the MGA, a significant correlation was  
50 observed between the two cuboid food pieces in the control group (Pearson's correlation,  
51  $r(381)=0.16$ ,  $p<0.01^{**}$ )(Fig S1C). However, hand preshaping is not seen within the neonatal MT-  
52 lesioned group (Pearson's correlation,  $r(338)=0.05$ ,  $p=0.33$ )(Fig S1D).

53

54 To interrogate the animal's ability to accurately engage a moving object in a naturalistic setting,  
55 animals were again required to reach and grasp a food reward, but in this instance the reward was  
56 placed on a variable speed/ direction turntable in front of the transport box (**Fig. 2b, I**). A  
57 difference in object retrieval error rate was observed between the two cohorts, with the neonatal  
58 MT-lesioned group having an increased error rate (permutation test,  $p=0.042$ ) (**Fig. 2J**). Further  
59 analysis of reach and grasp behaviour within the lesion cohort revealed that when retrieval of the  
60 food reward was unsuccessful, this was largely due to executing their reaching action prematurely  
61 (**Fig. 2K**). When lesioned animals failed in retrieval of moving objects, the magnitude of their  
62 failure was greater compared to controls (permutation test,  $p=0.003$ )(**Fig. 2L**). Further, they were  
63 less co-ordinated and consequently had less success in retrieval of the reward on their first attempt  
64 (permutation test,  $p=0.023$ )(Fig. S1E). The MGA, peak velocity and acceleration observed  
65 between both cohorts for the moving task were similar (Fig. S1F, G, H).

66

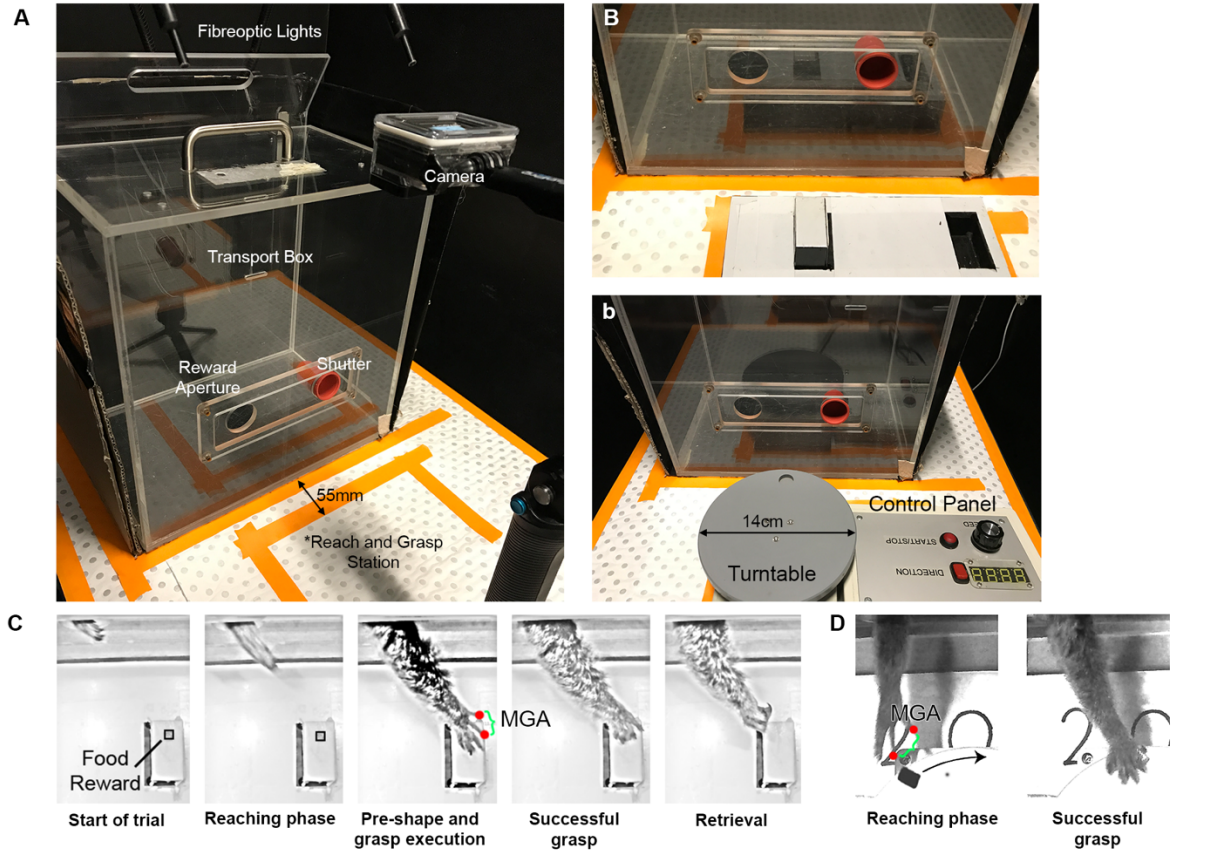

### STATIC OBJECT TASK

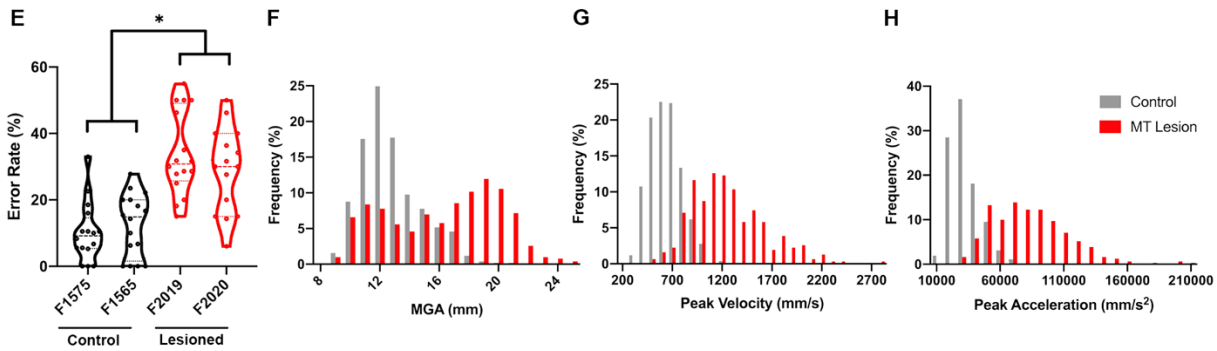

### MOVING OBJECT TASK

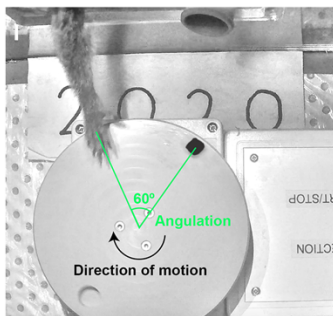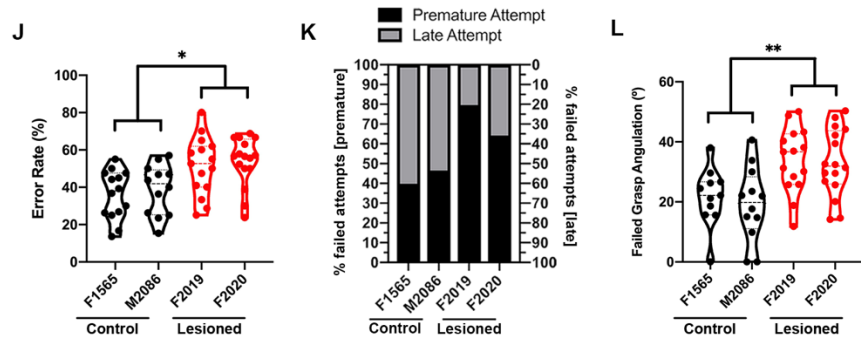

58 **Figure 2. Early-life MT lesions perturb goal orientated reach and grasp performance in**  
59 **static and moving objects.**

70 **(A)** Experimental setup of reach and grasp tasks. The animal is presented with either a static task  
71 **(B)** or moving task **(b)** (see methods for full details). **(C)** Example of 720p footage of an animal  
72 successfully grasping a static reward. **(D)** Example of 720p footage of an animal successfully  
73 grasping a moving reward. **(E)** Performance (error rate) of control vs lesioned animals in reaching  
74 and grasping static objects. Lesioned animals performed significantly worse (permutation test,  
75  $p=0.04^*$ ). **(F)** Frequency distribution across trials of maximum grip aperture (MGA) for control  
76 and lesioned animals. Lesioned animals exhibit a larger MGA in their grasp and reach with  
77 greater velocity **(G)** and acceleration **(H)**. **(I)** An example trial where the animal was delayed in  
78 reaching for the food reward and failed in the moving object reach and grasp trial, the magnitude  
79 of which was calculated. **(J)** Performance of control vs lesioned animals in reaching and grasping  
80 moving objects. Lesioned animals performed significantly worse (permutation test,  $p=0.042$ ). **(K)**  
81 Failed trials within the lesioned cohort were largely due to the animal reaching prematurely.  
82 Control animals showed close to a 1:1 proportion of premature and late reaching actions in failed  
83 trials whilst MT lesioned animals exhibited a tendency to reach prematurely. **(L)** The average  
84 magnitude of error as denoted by angulation in the failed trials. When lesioned animals failed in  
85 reaching and grasping moving objects, the magnitude of the miss was greater than controls  
86 (permutation test,  $p=0.003$ ).

87

## 38 **V1 responses are altered following an early-life lesion of MT**

39 As there is a significant monosynaptic projection between V1 and MT, we wanted to observe if an  
40 early-life lesion of MT impacted upon the response properties of neurons in the lesion projection  
41 zone (LPZ) of ipsilesional V1 in adulthood. Visually evoked single-unit activity was recorded in  
42 the LPZ of V1 from two animals (M1695 & F1696, **Fig. 3A**), with a total of 122 units recorded  
43 from. Visual stimuli were presented to determine the orientation and direction selectivity as well  
44 as optimal spatial and temporal frequencies for each of the units.

45  
46 Our first observation was that the basic retinotopic organisation of V1 was unaffected by the  
47 neonatal V1 lesion (**Fig. 3A**), which was expected. Our single-unit recordings revealed that 86.1%  
48 (105 out of 122) of V1 neurons within the LPZ were found to be orientation selective. The half-  
49 width-half-height (HWHH) bandwidth which is a traditional measure for orientation  
50 selectivity(33, 34) within the MT lesion affected V1 was observed to be 29.5° (**Fig. 3B**). This is  
51 comparable to the median HWHH bandwidth of 29.0° which has been reported previously for  
52 normal V1 neurons throughout the entire visual field(35). Direction selectivity (DS) of a cell was  
53 determined by calculating a direction selectivity index(35, 36), whereby an index of >0.5 suggests  
54 the cell is tuned for direction. Previous reports within marmoset V1 demonstrate approximately  
55 20% of V1 neurons are DS. Our findings were lower than this, with less than 10% (10 out of 122)  
56 classified to be direction selective (DS) (**Fig. 3C**). Although the proportion of DS can vary with  
57 eccentricity: central vision, 18% DS; near periphery, 26% DS; and, far periphery, 20% DS(35),  
58 our observations of ~10% fell below this previously reported proportion.

59  
60 Neurons in V1 within the two subjects responded optimally to a spatial frequency of 0.7 cycles/°  
61 (**Fig. 3D**) and a temporal frequency 2.3 Hz (**Fig. 3E**). Previously determined values for optimal  
62 spatial frequency was 1.08 cycles/° centrally and 0.45 cycles/° in the near periphery, with optimal

13 temporal frequency between 3.0-4.0 Hz across the entire visual field. Therefore, the  
14 spatiotemporal sensitivities appeared unaffected by an early-life MT ablation.

15

16 Together, the basic retinotopic layout and physiological properties of V1 neurons appeared  
17 unaffected by the early life MT lesion, with one exception. Namely, across the recorded areas,  
18 the proportion of directionally selective neurons was lower than previously reported, suggesting  
19 that MT may play a role in shaping these responses.

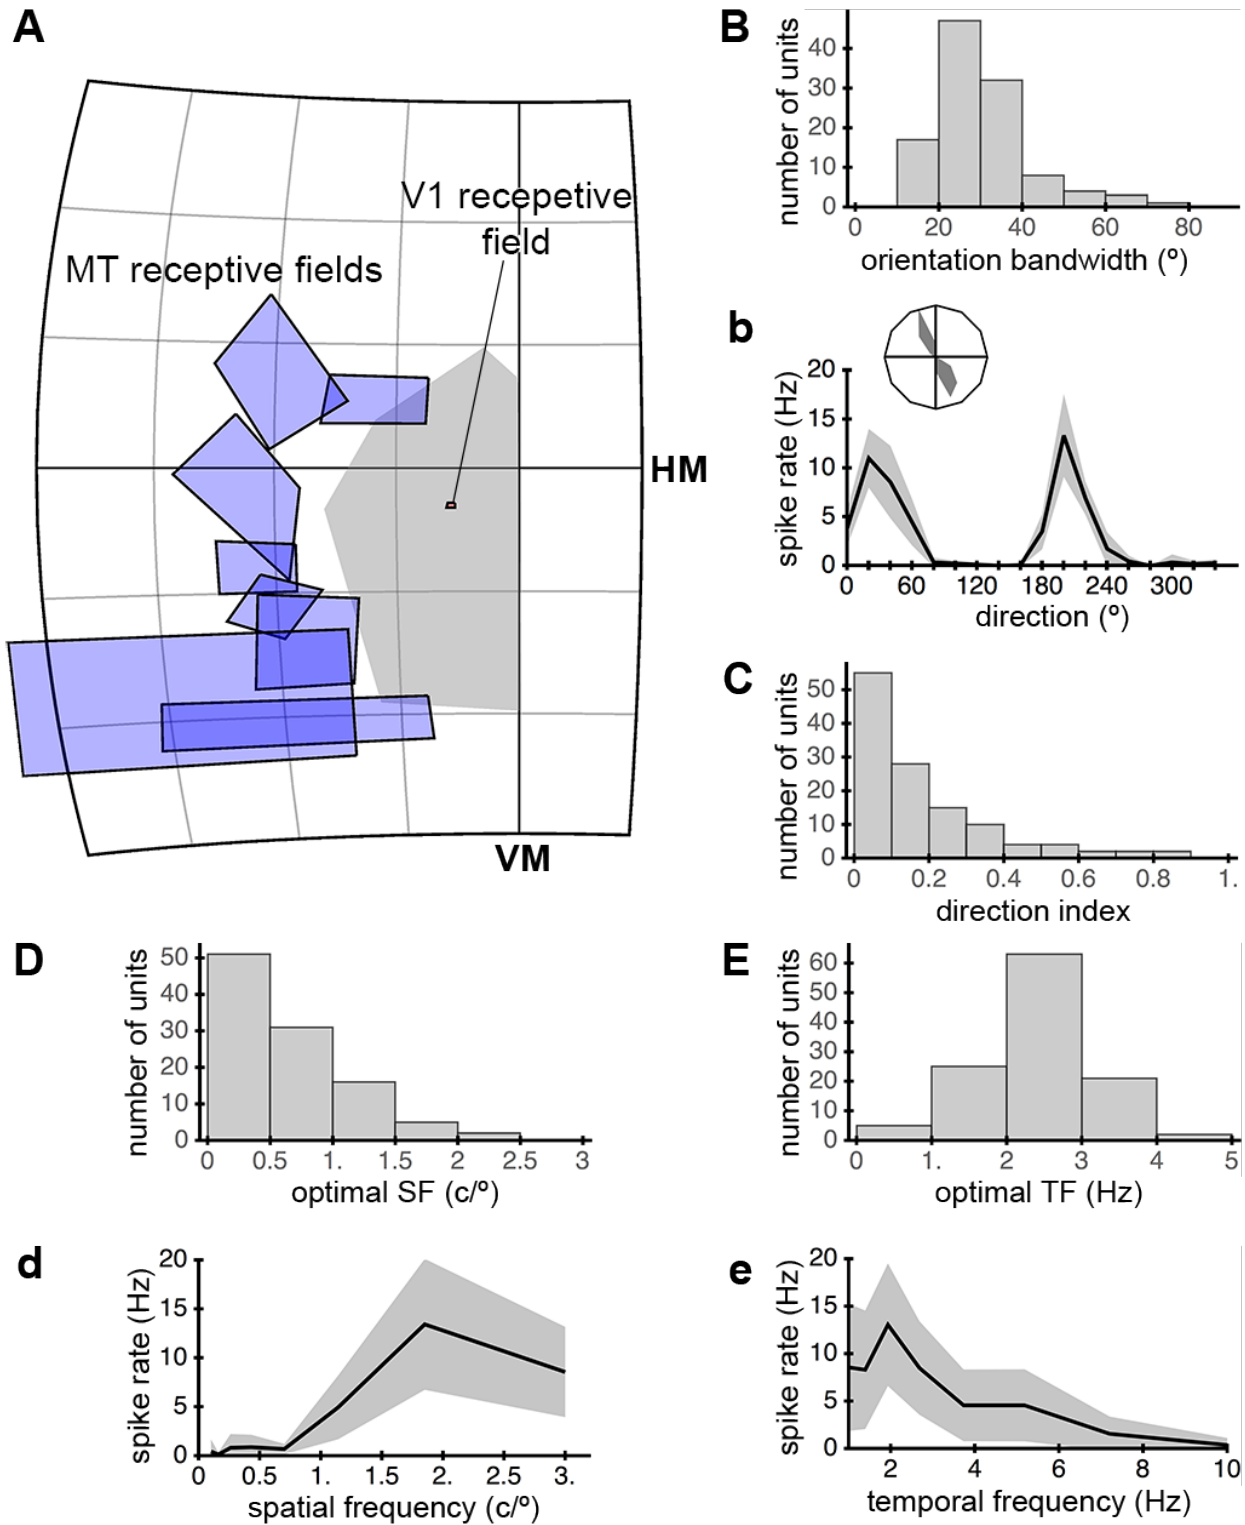

22 **Figure 3. Tuning properties of V1 neurons following unilateral MT lesion.**

23 **(A)** MT receptive fields were mapped by recording on the periphery of the lesion core. Following  
24 receptive field mapping, the scotoma is delineated and single unit recordings of V1 neurons were  
25 performed within the MT-V1 lesion projection zone (LPZ) (see methods for full details). **(B)** The  
26 orientation selectivity of all recorded V1 neurons as determined by the half-width-half-height  
27 bandwidth (Median HWHH = 29.5° from 122 units). **(b)** An example of the orientation tuning  
28 curve of a V1 neuron within the LPZ. **(C)** Direction index of the 122 V1 units recorded within the  
29 LPZ. A direction index of >0.5 suggests the neuron is directionally selectivity. Only 10 out of 122  
30 (~8%) of neurons were tuned for direction. V1 neurons within the LPZ responded optimally to a  
31 spatial frequency of 0.7 cycles/° **(D)** and temporal frequency of 2.3 Hz **(E)**. Examples of the  
32 spatial **(d)** and temporal frequency **(e)** tuning curves from V1 neuron within the LPZ are shown.

33

34 **Early-life lesions of MT lead to widespread changes in cortical architecture**

35 An advantage of our early-life lesion model is that it allows us to perform longitudinal MR  
36 imaging following the lesion. We performed whole brain DTI scans on our lesioned animals at 36  
37 weeks to determine the extent of chronic disruption to the cortical architecture. Voxel based  
38 morphometric (VBM) analysis of the DTI maps between the lesioned and non-lesioned  
39 hemisphere revealed, a reduction in fractional anisotropy (FA) in the intraparietal cortical areas  
40 AIP, MIP, posterior parietal area PE (dorsal stream areas), the frontal eye fields (FEFs) and V1 (p  
41 value <0.05)(**Fig. 1A; Fig. 4A, B**), areas MT has strong monosynaptic connections with. This  
42 result is suggestive of an altered state in the neuroanatomy of these areas, where a reduction in  
43 FA, has been correlated with both axonal and grey matter damage(37, 38).

44  
45 As we had previously demonstrated, there is a correlation between changes in FA and  
46 remodelling of the local circuitry(39), therefore we examined more closely the cellular  
47 neuroanatomy in the areas affected by the lesion of MT. Specifically, quantification of the  
48 calcium-binding protein, parvalbumin (PV) positive interneurons was undertaken as PV+ neurons  
49 have garnered significant interest as a component in the maturation of the neocortex and are  
50 functionally capable of amplifying circuit function(40–42). When compared to the non-lesioned  
51 hemisphere, PV+ cell density within the ipsilesional hemisphere was reduced in V1 (Mann-  
52 Whitney U test. Layers 2/3, p value = 0.0008; layers 5/6, p value = 0.046) and PE (Mann-Whitney  
53 U test. Layers 5/6, p value = 0.0029)(**Fig 4C, D**). Although there was a reduction in of PV+ cells  
54 in the other layers of V1 and PE, as well as IPC in the lesion animals, these were not significant.

55



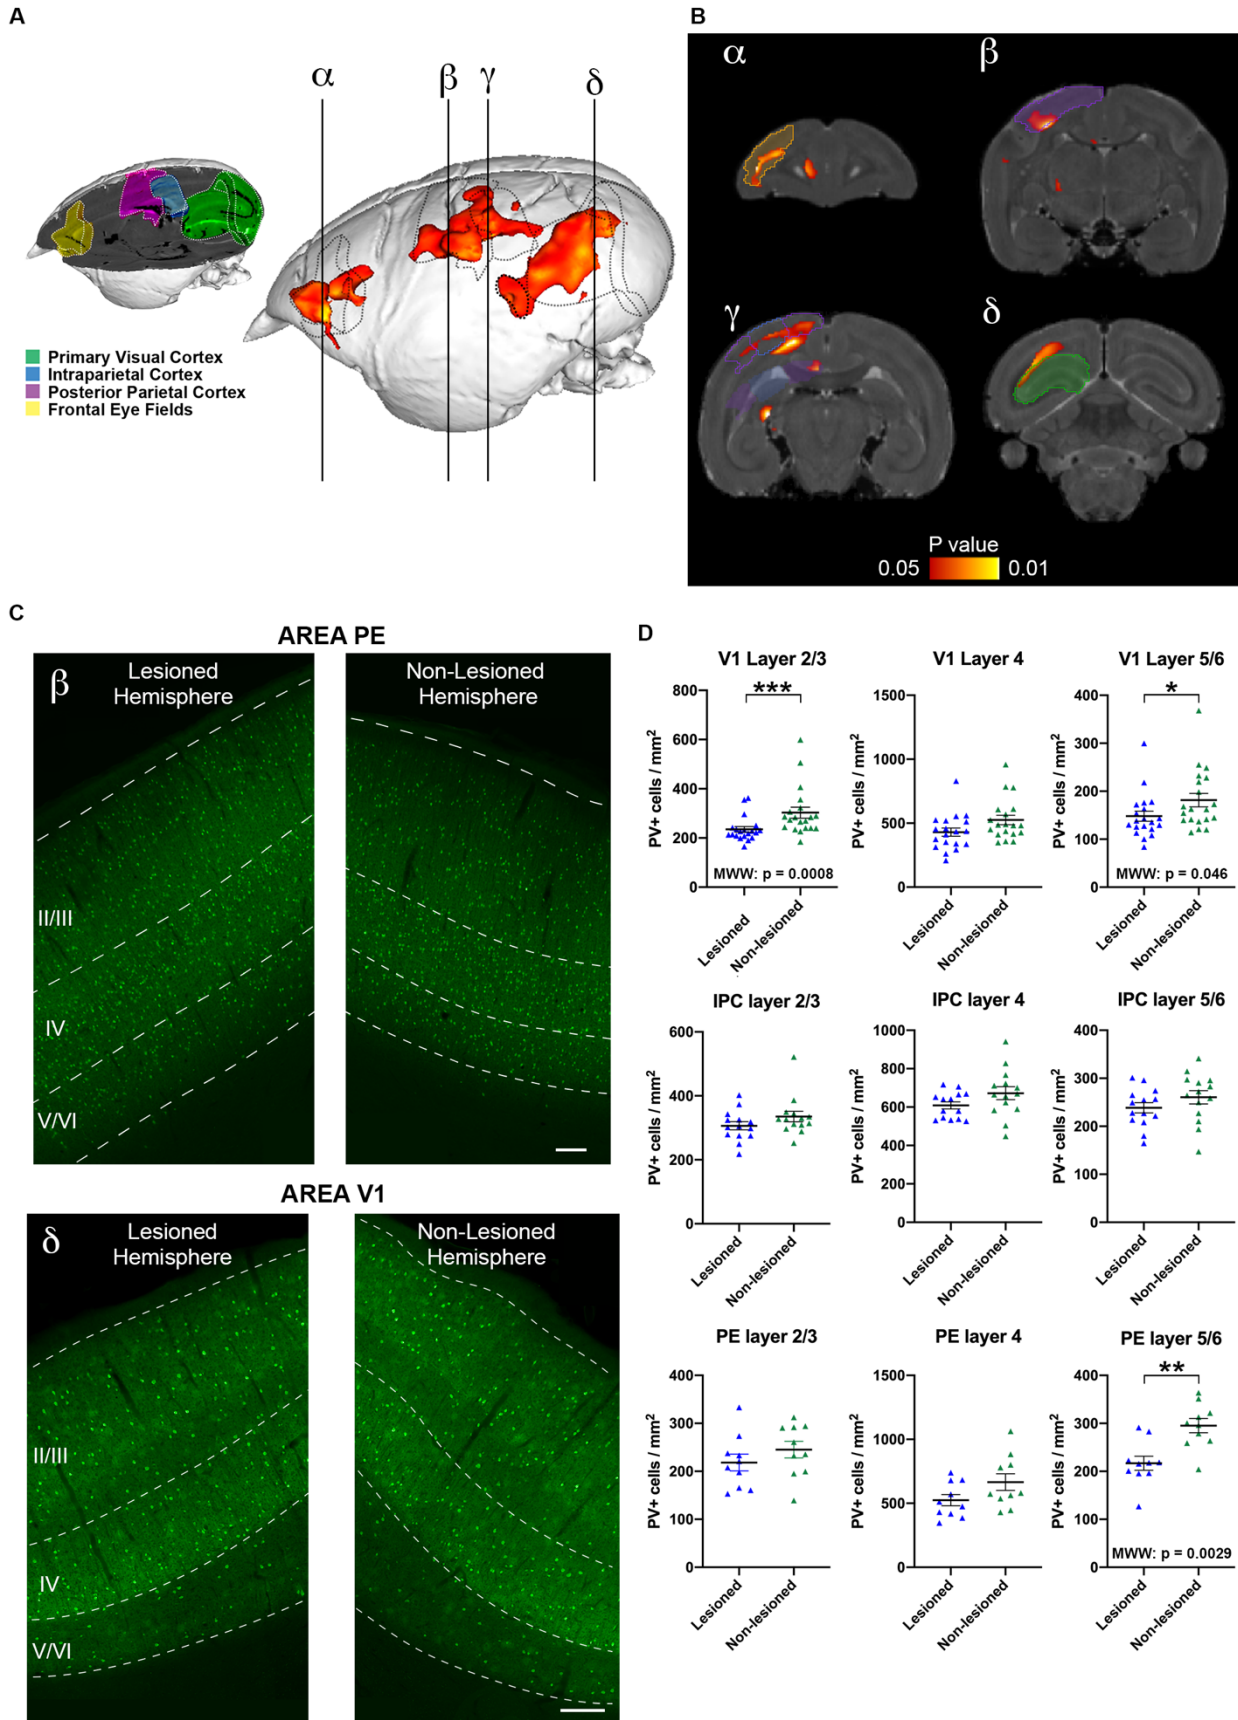

57 **Figure 4. Microstructural changes to the cortex following a unilateral MT lesion, as revealed**  
58 **by Diffusion Tractography Imaging (DTI) and parvalbumin (PV) fluorescent**  
59 **immunohistochemistry.**

50

51 **(A)** Voxel-based morphometry of fractional anisotropy (FA) maps. Yellow-red clusters represent  
52 significant hemispheric differences in FA, which was lower and observed in the ipsi-lesional  
53 primary visual cortex, intraparietal cortex, posterior parietal cortex and frontal eye fields (Left vs  
54 Right, n=5). Vertical lines ( $\alpha$ ,  $\beta$ ,  $\gamma$ ,  $\delta$ ) represent coronal sections in **(B)**. **(C, D)** PV+ interneurons  
55 were reduced in the lesioned hemisphere of areas PE and V1 (scale bar = 200 $\mu$ m). Scatter plots  
56 show significant reduction in PV neuronal density in infragranular layers of PE (p value = 0.0029)  
57 as well as supragranular layers (p value = 0.0008) and infragranular layers (p value = 0.046) of  
58 V1.

59

## 70 **Discussion**

71 This study was conceived with the objective to determine how MT contributes to development of  
72 the dorsal stream. Further, an early-life unilateral lesion of MT would enable us to determine the  
73 lifelong behavioural deficits associated with loss of this central area of the dorsal stream and the  
74 impact this has on upstream and downstream cortices. Clinical studies which examined the  
75 consequence of losing V1 in early life vs adulthood demonstrated a marked difference in  
76 behavioural performance(26–28). Patient BI, whom suffered a bilateral V1 injury at nine days of  
77 age retains the ability to perceive colour and possesses significant conscious vision. When  
78 comparing the visual abilities of BI to an extensively studied blindsight patient, such as GY, who  
79 sustained an injury to V1 at the age of 8, BI possesses greater preservation of vision. As there is a  
80 strong correlation with the age of when an injury is acquired and the preservation of abilities that  
81 neuroplasticity affords, we wanted to explore the effects an MT lesion would have on visuomotor  
82 behaviour in a developing visual system. Additionally, we wanted to determine if there are  
83 behaviours and brain areas which critically depend on MT. From our results, it is clear that an  
84 early-life lesion of MT has a significant impact on visual system behaviour and architecture and  
85 provides evidence that area MT is crucial in the normal establishment of the dorsal stream  
86 network.

87  
88 Seminal works studying the effect of lesions to MT on visual behaviour have unfortunately only  
89 looked at adult acquired loss. Newsome and colleagues provided awake behavioural evidence in  
90 the macaque that sensitivity to motion coherence is significantly disrupted following lesion to  
91 MT(43). Furthermore, MT is required to accurately track moving stimulus with smooth pursuit  
92 eye saccades. Visuomotor behaviour following bilateral MT lesion in adulthood has been  
93 examined in the macaque(44). The subjects were presented a battery of tests to probe reach and  
94 grasp behaviour in static and moving objects. Most notably, MT lesioned animals showed

95 impairment in their ability to engage in a static reach and grasp task whereby the food reward is  
96 placed in a narrow slot so that the animal must only use the index and thumb for successful  
97 retrieval of the food reward. Closer examination of the retrieval mechanism employed by the  
98 adult MT-lesion animals showed they had difficulty in orientating their hand and typically had to  
99 grasp the food reward with their whole hand and were unable to exhibit fine grasps with their  
100 fingertips. The authors were unable to determine the impact the adult acquired bilateral MT loss  
101 would have on visuomotor behaviour in moving objects. The moving object retrieval task in their  
102 study consisted of a spinning bowl which would rotate at 240RPM. A banana pellet would be  
103 dropped in the spinning bowl and as such bounce around. All animals had difficulty with this task  
104 and no significant difference was observed between control and lesioned cohorts. In our study,  
105 our animals also showed perturbations in hand posture when engaging in the static task as seen  
106 with MT lesioned animals, exhibiting a larger MGA when reaching for food reward. This  
107 suggests that MT is required for prehension throughout life. However, it is possible that the  
108 deficits observed in this adult lesion model are due to the lesion extending beyond MT, as  
109 removal of underlying white matter was a component of the ablation and degeneration of the  
110 LGN observed, suggestive of damage to the optic radiation.

11  
12 Clinically, there has only been one case of cerebral motion blindness described. Patient LM  
13 suffered a bilateral vascular insult to the temporal portions of her brain in adulthood, which  
14 included MT, as an adult with no injury evident in V1(23). Visual assessment of patient LM  
15 demonstrated that she had perturbations in reach and grasp behaviour, oculomotor scanning  
16 patterns and significant impairment in perceiving moving stimulus, although her ability to  
17 discriminate the colour and form of objects remained normal(24, 45). While LM clearly had  
18 akinetopsia, she demonstrated an ability to reach and grasp static objects, and objects which

19 moved up to speeds of 0.5m/sec (46). At speeds greater than 0.5m/sec, her performance greatly  
20 diminished and often executed her reach with greater velocity.

21

22 Our results share certain similarities with what has been observed in LM. Early-life MT lesioned  
23 marmosets also performed poorly when intercepting moving objects and displayed greater peak  
24 velocity and acceleration in their executed reach compared to controls during the static task. A  
25 notable difference between our study and LM's capabilities is that LM performed remarkably  
26 well when reaching for objects that were static or slower than 0.5m/sec and her ability to intercept  
27 objects at low speeds was on par with that of controls. Clinically, there is evidence that even with  
28 static object retrieval, transcranial magnetic stimulation of MT interferes with fluid goal-directed  
29 reaching(47). Our early-life lesioned marmosets, as well as the macaques with adulthood lesions  
30 in MT in the Gattass and colleagues' study, were unable to replicate the success LM possesses  
31 with static object retrievals. We believe LM's ability to reach out to stationary and slow-moving  
32 stimuli could be a testament to her remarkable adaptive strategies in utilising the static visual cues  
33 available to her to estimate trajectories of slow-moving items and her hand relative to the  
34 stationary target object. As the marmosets in our study displayed impairment in retrieval of  
35 moving objects akin to patient LM, we postulate that the plasticity of the developing brain does  
36 not permit for recovery of visuomotor function in moving targets. As such MT serves a critical  
37 node for visuomotor behaviours which require information from moving stimulus throughout life.

38

39 Further dissection of the failed behavioural trials by each marmoset in the moving object task  
40 revealed that the lesioned cohort initiated the reach prematurely. This observed behaviour could  
41 be due to the animal's inability to accurately detect the speed of the moving stimulus -  
42 akinetopsia, a deficit which was also observed in LM. It should be noted that motion is encoded in  
43 multiple cortical areas and not just MT(48, 49). Therefore, the intrinsic ability of the brain to

44 translate motion perception into a meaningful and precise goal-directed action relies on more than  
45 just sensitivity to motion coherence and further reinforces how integral MT is for object  
46 interaction, and the integral role it must place in the establishment of the associated networks  
47 during development.

48  
49 Existing literature has highlighted the importance the medial intraparietal area (MIP) and parietal  
50 area (PE) serve in reaching actions and limb coordination(50, 51). Considering we observed  
51 anatomical alterations specifically in these areas following an early-life lesion of MT, we suggest  
52 they are complicit in the perturbed reaching behaviour observed in both the static and moving  
53 object tasks. However, this does not explain why the lesioned marmosets demonstrate a similar  
54 kinematic profile as their control counterparts when intercepting moving targets. It is most likely,  
55 as marmosets do not have a refined hand use akin to macaques or chimpanzees(52, 53), that the  
56 tendency to execute reach and grasp tasks on moving targets with maximum velocity is their  
57 natural teleological behaviour, especially for fast arboreal manoeuvres. Despite the comparable  
58 kinematics in the moving object task, ultimately the lesioned animals tended to prematurely reach  
59 and fail to collect moving object.

50  
51 To the best of our knowledge, this is the first study examining the tuning properties of V1 neurons  
52 following an early-life injury to an extrastriate area. Previously, studies have examined the  
53 physiological properties of neurons in MT following a lesion of V1(54, 55), revealing receptive  
54 field size and tuning properties were dramatically affected. However, MT responses remained  
55 robust and largely unaffected following V1 lesions sustained in early life(56). The only noticeable  
56 deficit was a reduced proportion of DS neurons. This supports the idea that the visual brain is  
57 largely able to execute contingency mechanisms during development to afford a higher level of  
58 functional recovery following the early-life loss of V1. This concept has also been observed

59 clinically in subject BI, who following a bilateral early-life injury to V1 has significant  
70 preservation of vision, including sensitivity to moving stimuli(27). We wanted to observe the  
71 converse; if the tuning properties of V1 are vulnerable during development and extent of co-  
72 dependency between V1 and MT to develop DS or any other tuning property. In this study, we  
73 observed no dramatic perturbations in the tuning properties of V1 neurons. We did observe a  
74 lower proportion of DS neurons, which parallels previous findings for MT following an early-life  
75 lesion of V1(56). Modifications of V1 tuning properties, such as DS or even orientation  
76 selectivity has been reported before(57–59) but none specifically in relation to V1-MT circuitry.  
77 This warrants further investigation to determine if the MT-V1 projection serves a role in early life  
78 to tune DS within V1 neurons.

79  
80 As PV interneurons form the majority of GABAergic interneurons in V1(60), we sought to  
81 determine if there were disruptions to the local circuits by quantifying PV+ interneurons. Further,  
82 it is well documented that the local interneuron circuitry is more susceptible during development  
83 than in adulthood(61). MT has considerable reciprocal connectivity with layers 3C and 6 of  
84 V1(5),and we revealed a reduced PV+ cell density within both supra and infragranular layers.  
85 PV+ neurons in V1 have a diversity of feature-specific visual responses that include sharp  
86 orientation and DS, small receptive fields, and bandpass spatial frequency tuning(62). These  
87 results suggest that subsets of parvalbumin interneurons are components of specific cortical  
88 networks, and that perisomatic inhibition contributes to the generation of precise response  
89 properties. Ablation of PV in V1 interneurons has previously been observed to decrease DS  
90 properties within V1(63). Therefore, it is conceivable that the reduced PV population in V1  
91 following the early-life lesion of MT is the underlying basis to our observation of a lower  
92 proportion of DS neurons in V1.

04 The implications of this current study extend our understanding of the central role area MT  
05 occupies in the early establishment of the dorsal stream and associated behaviours, and its role as  
06 an anchor in the developing visual cortex. Further, our observation of a lower proportion of DS  
07 neurons within V1 could suggest a level of dependency on MT in early life in the tuning and  
08 appropriate maturation of V1 neurons. While marmosets lack fine motor skills, they have  
09 demonstrated their ability to use tools(64) and have the circuitry for accurate reach and grasp  
10 behaviours. Teleologically, the early establishment of the dorsal stream network provides  
11 primates the capacity to process vision-for-action, including accurate reaching and grasping  
12 behaviour, which is integral to their survival.

03

04

05



06 **Materials and Methods**

07

08 ***Subjects***

09 Five New World marmoset monkeys (*Callithrix jacchus*) received a mechanical ablation of the  
10 middle temporal (MT) area at postnatal day (PD) 14 (**Table 1**). Following surgical ablation, the  
11 animals were allowed 12 months of recovery before undergoing training for visual behaviour  
12 experimentation. Three aged-matched animals were used as controls for behavioural experiments  
13 (Table 1). All experiments were conducted in accordance with the Australian Code of Practice  
14 for the Care and Use of Animals for Scientific Purposes. All procedures were approved by the  
15 Monash University Animal Ethics Committee, which also monitored the health and wellbeing of  
16 the animals throughout the experiments.

| <i>Animal ID</i> | Neonatal unilateral MT Ablation | MRI/DTI | Reach & Grasp Behaviour | V1 Electrophysiology | Immuno-histochemistry |
|------------------|---------------------------------|---------|-------------------------|----------------------|-----------------------|
| <i>M1695</i>     | X                               | X       |                         | X                    |                       |
| <i>F1696</i>     | X                               | X       |                         | X                    |                       |
| <i>F1992</i>     | X                               | X       |                         |                      | X                     |
| <i>F2019</i>     | X                               | X       | X                       |                      | X                     |
| <i>F2020</i>     | X                               | X       | X                       |                      | X                     |
| <i>F1565</i>     |                                 |         | X                       |                      |                       |
| <i>F1575</i>     |                                 |         | X                       |                      |                       |
| <i>M2086</i>     |                                 |         | X                       |                      |                       |

17 **Table 1** - Marmosets employed in current study. Prefixes in animal ID: M=male; F=female.

## 18 **Mechanical ablation of area MT**

19 Neonatal marmosets (PD 14; n=5) were anaesthetised with isoflurane (1-2% in medical oxygen at  
20 0.5L.min<sup>-1</sup>) and placed into a custom built non-ferromagnetic stereotaxic frame to facilitate T2-  
21 weighted MRI to allow for demarcation and targeted ablation of area MT (**Fig. 1B**). Full details of  
22 preparation of the animal and how to localise areas of interest with MRI guidance have been  
23 described previously(65). Scans were exported as DICOM files and the brain images were  
24 visualised on the Horos v3.3.5 software (<https://horosproject.org>). Once MT was visualised,  
25 ablations were performed using a biopsy punch (diameter = 3.0 mm). Following ablation of  
26 cerebral tissue, the cavity was filled with Gelfoam, the cranium was reconstructed and the scalp  
27 was sutured. Animals would receive post-surgical antibiotic and analgesic medication and then  
28 allowed a minimum of 12 months recovery. to allow for plastic reorganisation of the brain.

29

## 30 **Longitudinal MR imaging**

31 During the animal's recovery, structural T2 images were acquired on a 9.4T small-bore animal  
32 scanner (Agilent) 6 weeks and 36 weeks post lesion to identify the extent of the lesion (**Fig. 1B**).  
33 The parameters for the T2 scan are: MRI structural images comprised T2 weighted images (9.4  
34 Tesla 18 cm bore MRI scanner (Bruker); 2D-RARE sequence, TR=12000 ms, TE=48 ms, Matrix  
35 size=200x180, FOV= 40x36mm<sup>2</sup>, number of slices = 80, slice thickness=0.4mm, RARE factor =  
36 8, axial plane, and 4 averages; scan time 30 minutes). Additionally, at the same time points,  
37 diffusion tensor imaging (DTI) was acquired for analysis of changes in microstructure in visual  
38 cortical tissue following injury. DTI was acquired in the axial orientation using a six-shot spin-  
39 echo echo planar imaging (EPI)- based DTI sequence. Scan parameters included: TR/TE of  
40 3,000/31 ms, FOV of 38.4 × 38.4 mm<sup>2</sup>, data matrix of 96 × 96, and 50 slices with thickness of 0.4  
41 mm. Diffusion encoding gradients were applied in 30 directions, with a b value of 800, gradient  
42 duration of 5 ms, and separation of 18 ms. A reference scan with inverted phase and readout

43 gradients was acquired for phase correction to reduce EPI and DTI-specific artefacts. The average  
44 of the reference and the original scan also increased the signal-to-noise ratio (SNR). The DTI  
45 sequence was repeated four times and saved separately with the aim of further increasing SNR  
46 and generating backup data in case any unexpected motion artifacts occurred during the relatively  
47 long scan. The whole DTI scan took ~80 min.

48  
49 Diffusion weighted data were pre-processed and analysed using tools from different software  
50 packages that work well with the small sized marmoset brain. MriCron, dcm2nii script  
51 (<http://people.cas.sc.edu/rorden/mricron/dcm2nii.html> ) was used for conversion of DiCOM to  
52 nifti files; averaging, orientation of different DWI repetitions and corrections for movement  
53 distortions was scripted using FSL 5.0.9 software library of the Centre for Functional Magnetic  
54 Resonance Imaging of the Brain (FMRIB, University of Oxford, UK, [www.fmrib.ox.ac.uk/fsl](http://www.fmrib.ox.ac.uk/fsl)).  
55 Binary brain masks were generated using Brainsuite 15c ([www.brainsuite.org](http://www.brainsuite.org)). Diffusion tensors  
56 and derived fractional anisotropy maps (FA) were calculated using MRtrix3 ([www.mrtrix.org](http://www.mrtrix.org)).

57 (66)

58

### 59 **Visual Behaviour Training**

50 Visual behaviour experiments commenced following a minimum of 12 months recovery from the  
51 MT ablative surgery. Detailed stepwise training and habituation protocols to allow for  
52 implementing reach and grasp behavioural experiments in the marmoset have been previously  
53 described(32).

54

55 Animals were first trained to enter a custom fabricated behaviour training box (Monash  
56 Instrumentation Development Facility). Food rewards are given to positively encourage  
57 participation in desired behaviours. Following habituation with the behaviour box, the animal is

58 transferred to an adjacent room where the behavioural experimentation is conducted. Food  
59 rewards are once again given to habituate the animal with the room.  
70  
71 Following complete habituation, the animal's ability in goal orientated reach and grasp of static  
72 objects was examined whereby the animal is presented with a target object in the form of a food  
73 reward (piece of fruit). The food reward was placed in one of two positions on a pedestal, both of  
74 which are equidistant to an aperture in the behaviour box (**Fig. 2A-D**). These two positions could  
75 favour either the left or right hand. To determine the animals' hand preshaping behaviour and if  
76 the size of the target object would have a significant effect on performance, the food reward was  
77 cut into cuboids where the largest face would be ~5x5mm or ~10x10mm. The precise size of the  
78 food reward was qualified during the video analysis of each trial with in- built tools in Tracker  
79 software. Before commencement of a static task trial, a blind is placed in front of the transport  
80 box and its apertures so the animal could not prime its hand in anticipation of the position of the  
81 reward. Each static object retrieval session consisted of 15 - 20 trials. The proportion of trials of  
82 small vs large object presentation was equal.

83  
84 To assess the animal's ability in reaching and grasping a moving object, a single sized food  
85 reward (cuboid, ~10x10mm face) was placed on the edge of a custom-built rotating turntable  
86 ( $\varnothing=14\text{cm}$ , Monash University Instrumentation Development Facility)(**Fig. 2b, D**). The centre of  
87 the turntable was aligned with the centre of the transport which was equidistant to both right and  
88 left apertures. Objects were always placed in the same spot of the turntable across all trials.  
89 Shutters were used to occlude the reaching apertures to control the use of hand (i.e, the animal  
90 would use its right hand when the right aperture was unblocked and vice versa). The shutter was  
91 removed, and the trial commenced once the food reward had undergone one revolution to ensure  
92 that the turntable can accelerate to the desired speed for the task. Animals were given a 10-second

03 response time for each trial. Animals were allowed a maximum of three attempts within each trial  
04 for it to be considered successful. Background white noise was played throughout the sessions to  
05 minimise any impact the noise produced by the turntable would have in the animal's performance.  
06 Three independent variables were incorporated to the turntable task; 1) Six different revolution  
07 speeds, which ranges from 10 to 60 revolutions per minute (RPM), 2) Direction of the revolution  
08 (clockwise/anti-clockwise), and 3) Hand used to retrieve the object (**Table 2**). This resulted in 24  
09 different conditions that would be presented during a training session. The order of the trial  
10 conditions randomised across sessions and a single condition (eg. object moving at a speed of  
11 30RPM in a clockwise direction with the aperture opened for the left hand) did not repeat in the  
12 same session.

03

| <b>Independent Variable</b> | <b>Description</b>                                                             |
|-----------------------------|--------------------------------------------------------------------------------|
| <b>Speed</b>                | 10, 20, 30, 40, 50, 60 RPM                                                     |
| <b>Direction</b>            | clockwise or anti-clockwise                                                    |
| <b>Hand Use</b>             | Aperture blocked to allow for only the left or right hand for object retrieval |

04 **Table 2** – Independent variables employed in moving reach and grasp task

### 05 **Analysis of visual behaviour performance**

06 Trials for the static object task were binned into three main categories; a successful trial was  
07 defined as a single coordinated motor action to retrieve the object. Corrected trials occurred when  
08 animals required fewer than three corrections in either their reach or grasp to retrieve the object

09 successfully. Failure to meet the conditions of the two previous bins, or not completing the action  
10 within the given time frame, was assigned to the failed trial category. Trials for the moving object  
11 task were binned into two main categories; a successful trial when the animal retrieved the  
12 rotating object within three attempts, a failed trial when more than three attempts were required  
13 for retrieval or the object was dislocated from the initial position. Trials with no response were  
14 considered invalid and discarded.

15 All trials were recorded using “GoPro HERO4 Black” camera (1280x790-pixel resolution, 120  
16 frames/sec, narrow view) from the transverse plane perpendicular to the plane of motion (i.e. top-  
17 down view) and videos captured were analysed offline. The same investigator (C-K.C) performed  
18 and analyzed all videos offline manually in a blinded manner to determine the performance and  
19 kinematics of each trial. The performance as expressed by error rate was determined by dividing  
20 the number of failed trials over the total number of trials within a given session. The overall  
21 performance of a given task in each animal was determined with permutation testing of the  
22 performance of all sessions.

23 Video files were transferred to an open source software Tracker v4.93 ([physlets.org/tracker/](https://physlets.org/tracker/))  
24 designed to perform a 2D kinematic analysis. A reference scale of known size remained in the  
25 field of view and was positioned at the height of the reaching movements to eliminate any  
26 perspective errors. The edges of the reaching platform served as reference points for X and Y axes  
27 to track movement trajectories across each trial. Three metrics were measured in the video  
28 analysis. The maximum grip aperture (MGA) between the animal’s thumb and index finger when  
29 the animal pre-shapes its hand in acquiring an object, the velocity at which the animal would  
30 move to grasp an object as well as the acceleration. Additionally, the junctions between the nail  
31 and digit of the index finger and thumb were used as reference points to measure the Euclidean  
32 distance over time. Movement duration was defined as the time elapsed from the moment the  
33 thumb reference point was visible outside of the reaching aperture in the box to the moment when

34 either the index finger or thumb made contact with piece of fruit (identified by it moving for at  
35 least three consecutive frames). The length of the food reward in each trial was measured against  
36 the reference scale and plotted against the MGA of the trial using Prism version 8.4.2 to  
37 determine if the animal exhibited any hand preshaping behaviour. All failed trials were further  
38 sorted to determine whether the animals exhibited a premature or delayed reach while attempting  
39 to retrieve the food reward. The angle between the final hand position over the turntable and the  
40 food reward was then measured on Tracker v4.93 to determine the accuracy of targeting the  
41 object (**Fig. 2I**). Mean angulation was calculated in each session for each animal to reveal overall  
42 angulation of failed trials across all sessions.  $P \leq 0.05$  were considered to be statistically  
43 significant. All data are presented as mean  $\pm$  standard error of the mean SEM).

44

### 45 **Electrophysiological recordings**

46 Animals M1695 and F1696 underwent a single recording session under deep anaesthesia. The  
47 detailed methodology of how the animals were prepared for electrophysiology is described in  
48 Bourne & Rosa(67). In brief, animals underwent a tracheotomy and two craniotomy procedures  
49 with anaesthesia being maintained with a continuous intravenous infusion of a mixture of  
50 pancuronium bromide ( $0.1 \text{ mg.kg}^{-1}.\text{h}^{-1}$ ), sufentanil ( $6 \mu\text{g.kg}^{-1}.\text{h}^{-1}$ ), and dexamethasone ( $0.4$   
51  $\text{mg.kg}^{-1}.\text{h}^{-1}$ ), in a saline–glucose solution. During the recordings, animals were also ventilated  
52 with nitrous oxide and oxygen (7:3).

53

54 The electrophysiological experiments consisted of two phases. Firstly, the scotoma of each animal  
55 was mapped by determination of MT complex receptive fields along the perimeter of the lesion  
56 core. Following identification of the scotoma, recordings were conducted in V1 within and  
57 outside the lesion projection zone. Recordings were performed with tungsten microelectrodes ( $\sim$   
58  $1\text{M}\Omega$ ). Insertion of the electrodes to our eccentricity of interest was guided by stereotaxic and

59 topographical data described in previous studies(5, 68) . Amplification and filtering were  
60 achieved via an AM Systems model 1800 microelectrode alternating current amplifier. Stimuli  
61 presentation and methods for quantification of tuning for orientation and direction as well as  
62 spatial and temporal frequency within V1 was performed as per previous studies(35, 56, 69).

53

### 54 **Histology and immunohistochemical tissue processing**

55 Animals were euthanised with an overdose of sodium pentobarbitone (>100mg/kg) then  
56 transcardially perfused with 10mM PBS that has been supplemented with heparin (50 IU/ml of  
57 PBS), followed by 4% paraformaldehyde in 10mM PBS. Brains were post-fixed in 4%  
58 paraformaldehyde then dehydrated in serial solutions of PBS-sucrose before being snap frozen in  
59 2-methylbutane that has been chilled to -50°C and stored in a -80°C freezer until cryosectioning.

70

71 Brain samples were cryosectioned in the coronal plane at 50um, divided into five series and  
72 stored free-floating in a cryoprotective solution (as outlined in previous work(3)).

73 Half a series was stained for myelin via silver impregnation(70) to demarcate area MT and to  
74 qualify the size of the lesion and spatially, the extent of MT which was ablated (**Fig. 1C**). Free-  
75 floating sections were labelled with GABAergic interneuronal marker parvalbumin (PV; Swant,  
76 PV27 1:3000).

77

### 78 **Microscopy and digital image processing**

79 Brain sections were imaged with an Axio Imager Z1 microscope (Zeiss). Images were obtained  
80 with a Zeiss Axiocam HRm digital camera using Axiovision software (v. 4.8.1.0) at a resolution  
81 of 1024 by 1024 or 2048 by 2048 pixels and saved in ZVI and exported to TIFF format. The  
82 objectives used were Zeiss EC-Plan Neofluar 5x0.16, #420330- 9901, EC-Plan Neofluar 10x0.3,  
83 #420340-9901. Filter sets used for visualizing immunolabelled cells were Zeiss 38 HE eGFP #



34 489038-9901-000.

35 Images used for cell density quantification were taken with the 10x objective. Stitching of images  
36 and adjustments to contrast and brightness was performed using Adobe Photoshop 2020 v21.0.1  
37 or Zeiss MosaiX software. The contours, boundaries, and line art of all figures were drawn using  
38 Adobe Illustrator 2020 v24.0.1.

39 Quantification of interneuronal density was conducted as per previous work(30). Each area or  
40 interest had analysis of PV cell density within the supragranular layers 2 and 3, granular layer 4 or  
41 infragranular layers 5 and 6. For each animal, 6 sections randomly selected across the anterior-  
42 posterior axis across our areas of interest. The regions that were sampled are V1, the areas around  
43 the intraparietal area which consists of areas AIP, LIP & MIP and area PE which is part of the  
44 posterior parietal cortex. Analysis of photomontages of CB and PV IR cells was conducted using  
45 Fiji image software(71). The same investigator (W.C.K) performed all quantifications in a blinded  
46 manner.

47

## 48 **Statistical analysis**

49 Assessment of the behavioural performance of an animal was determined through their error rate  
50 in each session. The error rate, as well as the frequency of successful retrieval on the first attempt  
51 was examined using a non-parametric permutation test on Microsoft Excel version 16.62. The  
52 kinematic analysis of reach and grasp behaviours which include MGA, velocity, acceleration and  
53 angulation was also examined using a non-parametric permutation test on Microsoft Excel  
54 version 16.62. Within the permutation test, data were repeatedly resampled (5000 times) to  
55 determine the difference between cohorts.  $P \leq 0.05$  were considered to be statistically significant.

06 To determine if sizes of the food reward have any influence on the performance, an ANCOVA  
07 analysis was performed on Prism version 8.4.2 to compare the error rate of large and small sizes  
08 across sessions. A linear regression was also performed on Prism version 8.4.2 to determine the  
09 hand preshaping behaviour against food lengths.  $P \leq 0.05$  were considered to be statistically  
10 significant.

11 Statistical analysis for PV+ cell density as presented as mean  $\pm$  standard error of the mean was  
12 carried out using Prism version 8.4.2 software. Comparison between the ipsi-lesional and contra-  
13 lesional V1 were examined by a non-parametric Mann-Whitney U test.  $P \leq 0.05$  were considered  
14 to be statistically significant.

15 For voxel-based morphometry statistical analysis of FA maps a general linear model following a  
16 two-sample t-test was used comparing left (lesioned) and right (control) hemispheres (SPM12,  
17 The Wellcome Trust Centre for Neuroimaging, UCL, UK) as follows. FA maps from all MT-  
18 lesion animals were registered to a marmoset brain template  
19 (<http://brainatlas.brain.riken.jp/marmoset/>. BSI-Neuroinformatics, Riken Institute, Japan) using  
20 the normalized mutual information function (7-degree B-spline). Resulting images were smoothed  
21 with 1 mm isotropic Gaussian kernel. Subsequently, images were flipped and registered again to  
22 original unflipped images. Significance level was  $P < 0.05$  corrected for the familywise error rate  
23 (FWE) with and extended threshold of 1 voxel. Z-scores converted to P values were displayed on  
24 the Brain/MINDS 3D digital marmoset atlas(66) using Mango 4.1 software from the Research  
25 Imaging Institute, University of Texas Health Centre at San Antonio ([ric.uthscsa.edu/mango](http://ric.uthscsa.edu/mango)).

26

27 **References**

28

29 1. M. A. Goodale, A. D. Milner, Separate visual pathways for perception and action. *Trends*  
30 *Neurosci.* **15**, 20–25 (1992).

31 2. L. Ungerleider, M. Mishkin, Two cortical visual systems. In “Analysis of Visual Behavior”(DJ  
32 Ingle, MA Goodale, and RJW Mansfield, eds.). *null* (1982).

33 3. J. A. Bourne, M. G. P. Rosa, Hierarchical Development of the Primate Visual Cortex, as  
34 Revealed by Neurofilament Immunoreactivity: Early Maturation of the Middle Temporal Area  
35 (MT). *Cereb Cortex.* **16**, 405–414 (2005).

36 4. C. E. Warner, W. C. Kwan, J. A. Bourne, The early maturation of visual cortical area MT is  
37 dependent on input from the retinorecipient medial portion of the inferior pulvinar. *Journal of*  
38 *Neuroscience.* **32**, 17073–17085 (2012).

39 5. I.-C. Mundinano, W. C. Kwan, J. A. Bourne, Retinotopic specializations of cortical and  
40 thalamic inputs to area MT. *Proc National Acad Sci.* **116**, 23326–23331 (2019).

41 6. L. C. Sincich, K. F. Park, M. J. Wohlgemuth, J. C. Horton, Bypassing V1: a direct geniculate  
42 input to area MT. *Nat Neurosci.* **7**, 1123–1128 (2004).

43 7. C. E. Warner, Y. Goldshmit, J. A. Bourne, Retinal afferents synapse with relay cells targeting  
44 the middle temporal area in the pulvinar and lateral geniculate nuclei. *Front Neuroanat.* **4**, 8–8  
45 (2010).

46 8. M. G. P. Rosa, Visual maps in the adult primate cerebral cortex: some implications for brain  
47 development and evolution. *Braz J Med Biol Res.* **35**, 1485–1498 (2002).

- 48 9. L. G. Ungerleider, M. Mishkin, The striate projection zone in the superior temporal sulcus  
49 of *Macaca mulatta*: Location and topographic organization. *J Comp Neurology*. **188**, 347–366  
50 (1979).
- 51 10. D. C. Lyon, J. H. Kaas, Connectional and Architectonic Evidence for Dorsal and Ventral V3,  
52 and Dorsomedial Area in Marmoset Monkeys. *J Neurosci*. **21**, 249 (2001).
- 53 11. J. Maunsell, D. van Essen, The connections of the middle temporal visual area (MT) and their  
54 relationship to a cortical hierarchy in the macaque monkey. *J Neurosci*. **3**, 2563–2586 (1983).
- 55 12. L. A. Krubitzer, J. H. Kass, Cortical connections of MT in four species of primates: Areal,  
56 modular, and retinotopic patterns. *Visual Neurosci*. **5**, 165–204 (1990).
- 57 13. C. L. Colby, J. R. Duhamel, M. E. Goldberg, Ventral intraparietal area of the macaque:  
58 anatomic location and visual response properties. *J Neurophysiol*. **69**, 902–914 (1993).
- 59 14. M. G. Maioli, S. Squatrito, C. Galletti, P. P. Battaglini, E. R. Sanseverino, Cortico-cortical  
50 connections from the visual region of the superior temporal sulcus to frontal eye field in the  
51 macaque. *Brain Res*. **265**, 294–299 (1983).
- 52 15. P. Majka, S. Bai, S. Bakola, S. Bednarek, J. M. Chan, N. Jermakow, L. Passarelli, D. H.  
53 Reser, P. Theodoni, K. H. Worthy, X.-J. Wang, D. K. Wójcik, P. P. Mitra, M. G. P. Rosa, Open  
54 access resource for cellular-resolution analyses of corticocortical connectivity in the marmoset  
55 monkey. *Nat Commun*. **11**, 1133 (2020).
- 56 16. C.-S. Lin, J. H. Kaas, Projections from the medial nucleus of the inferior pulvinar complex to  
57 the middle temporal area of the visual cortex. *Neuroscience*. **5**, 2219–2228 (1980).

- 58 17. D. C. Lyon, J. J. Nassi, E. M. Callaway, A Disynaptic Relay from Superior Colliculus to  
59 Dorsal Stream Visual Cortex in Macaque Monkey. *Neuron*. **65**, 270–279 (2010).
- 70 18. L. G. Ungerleider, R. Desimone, T. W. Galkin, M. Mishkin, Subcortical projections of area  
71 MT in the macaque. *J Comp Neurology*. **223**, 368–386 (1984).
- 72 19. R. Dubner, S. M. Zeki, Response properties and receptive fields of cells in an anatomically  
73 defined region of the superior temporal sulcus in the monkey. *Brain Research*. **35**, 528–532  
74 (1971).
- 75 20. T. D. Albright, Direction and orientation selectivity of neurons in visual area MT of the  
76 macaque. *J Neurophysiol*. **52**, 1106–1130 (1984).
- 77 21. W. Newsome, R. Wurtz, M. Dursteler, A. Mikami, Deficits in visual motion processing  
78 following ibotenic acid lesions of the middle temporal visual area of the macaque monkey. *J*  
79 *Neurosci*. **5**, 825 (1985).
- 80 22. M. R. Dürsteler, R. H. Wurtz, W. T. Newsome, Directional pursuit deficits following lesions  
81 of the foveal representation within the superior temporal sulcus of the macaque monkey. *Journal*  
82 *of Neurophysiology*. **57**, 1262–1287 (1987).
- 83 23. J. Zihl, D. V. Cramon, N. Mai, Selective Disturbance of Movement Vision After Bilateral  
84 Brain Damage. *Brain*. **106**, 313–340 (1983).
- 85 24. S. Zeki, Cerebral Akinetopsia (Visual Motion Blindness). *Brain*. **114**, 811–824 (1991).
- 86 25. A. K. JANSEN-AMORIM, B. LIMA, M. FIORANI, R. GATTASS, GABA inactivation of  
87 visual area MT modifies the responsiveness and direction selectivity of V2 neurons in Cebus  
88 monkeys. *Visual Neurosci*. **28**, 513–527 (2011).

- 39 26. L. Weiskrantz, E. K. Warrington, M. Sanders, J. Marshall, Visual capacity in the hemianopic  
90 field following a restricted occipital ablation. *Brain*. **97**, 709–728 (1974).
- 91 27. I.-C. Mundinano, J. Chen, M. de Souza, M. G. Sarossy, M. F. Joannis, M. A. Goodale, J. A.  
92 Bourne, More than blindsight: Case report of a child with extraordinary visual capacity following  
93 perinatal bilateral occipital lobe injury. *Neuropsychologia*. **128**, 178–186 (2019).
- 94 28. S. E. Leh, A. Ptito, M. Schönwiesner, M. M. Chakravarty, K. T. Mullen, Blindsight Mediated  
95 by an S-Cone-independent Collicular Pathway: An fMRI Study in Hemispherectomized Subjects.  
96 *J Cognitive Neurosci*. **22**, 670–682 (2009).
- 97 29. A. Tran, M. W. MacLean, V. Hadid, L. Lazzouni, D. K. Nguyen, J. Tremblay, M. Dehaes, F.  
98 Lepore, Neuronal mechanisms of motion detection underlying blindsight assessed by functional  
99 magnetic resonance imaging (fMRI). *Neuropsychologia*. **128**, 187–197 (2019).
- 00 30. I.-C. Mundinano, W. C. Kwan, J. A. Bourne, Mapping the mosaic sequence of primate visual  
01 cortical development. *Front Neuroanat*. **9**, 132 (2015).
- 02 31. C. E. Warner, W. C. Kwan, D. Wright, L. A. Johnston, G. F. Egan, J. A. Bourne, Preservation  
03 of Vision by the Pulvinar following Early-Life Primary Visual Cortex Lesions. *Current Biology*.  
04 **25**, 424–434 (2015).
- 05 32. D. M. Fox, I. Mundinano, J. A. Bourne, Prehensile kinematics of the marmoset monkey:  
06 Implications for the evolution of visually-guided behaviors. *J Comp Neurol*. **527**, 1495–1507  
07 (2019).
- 08 33. D. Rose, C. Blakemore, An analysis of orientation selectivity in the cat's visual cortex. *Exp*  
09 *Brain Res*. **20**, 1–17 (1974).

- 10 34. G. H. Henry, P. O. Bishop, R. M. Tupper, B. Dreher, Orientation specificity and response  
11 variability of cells in the striate cortex. *Vision Res.* **13**, 1771–1779 (1973).
- 12 35. H.-H. YU, M. G. P. Rosa, Uniformity and diversity of response properties of neurons in the  
13 primary visual cortex: Selectivity for orientation, direction of motion, and stimulus size from  
14 center to far periphery. *Visual Neurosci.* **31**, 85–98 (2014).
- 15 36. D. L. Ringach, R. M. Shapley, M. J. Hawken, Orientation Selectivity in Macaque V1:  
16 Diversity and Laminar Dependence. *J Neurosci.* **22**, 5639–5651 (2002).
- 17 37. T. A. G. M. Huisman, L. H. Schwamm, P. W. Schaefer, W. J. Koroshetz, N. Shetty-Alva, Y.  
18 Ozsunar, O. Wu, A. G. Sorensen, Diffusion tensor imaging as potential biomarker of white matter  
19 injury in diffuse axonal injury. *Ajnr Am J Neuroradiol.* **25**, 370–6 (2004).
- 20 38. A. Shereen, N. Nemkul, D. Yang, F. Adhami, R. S. Dunn, M. L. Hazen, M. Nakafuku, G.  
21 Ning, D. M. Lindquist, C.-Y. Kuan, Ex vivo diffusion tensor imaging and neuropathological  
22 correlation in a murine model of hypoxia-ischemia-induced thrombotic stroke. *J Cereb Blood*  
23 *Flow Metabolism Official J Int Soc Cereb Blood Flow Metabolism.* **31**, 1155–69 (2010).
- 24 39. I.-C. Mundinano, D. M. Fox, W. C. Kwan, D. Vidaurre, L. Teo, J. Homman-Ludiye, M. A.  
25 Goodale, D. A. Leopold, J. A. Bourne, Transient visual pathway critical for normal development  
26 of primate grasping behavior. *Proc National Acad Sci*, 201717016 (2018).
- 27 40. A. E. Hendrickson, J. F. M. van Brederode, K. A. Mulligan, M. R. Celio, Development of the  
28 calcium-binding proteins parvalbumin and calbindin in monkey striate cortex. *J Comp Neurology.*  
29 **307**, 626–646 (1991).

- 30 41. J. A. Cardin, M. Carlén, K. Meletis, U. Knoblich, F. Zhang, K. Deisseroth, L.-H. Tsai, C. I.  
31 Moore, Driving fast-spiking cells induces gamma rhythm and controls sensory responses. *Nature*.  
32 **459**, 663–667 (2009).
- 33 42. V. S. Sohal, F. Zhang, O. Yizhar, K. Deisseroth, Parvalbumin neurons and gamma rhythms  
34 enhance cortical circuit performance. *Nature*. **459**, 698–702 (2009).
- 35 43. W. Newsome, E. Pare, A selective impairment of motion perception following lesions of the  
36 middle temporal visual area (MT). *J Neurosci*. **8**, 2201 (1988).
- 37 44. R. Gattass, J. G. M. Soares, B. Lima, Effects of MT lesions on visuomotor performance in  
38 macaques. *Prog Neurobiol*, 101931 (2020).
- 39 45. J. Zihl, C. A. Heywood, The contribution of LM to the neuroscience of movement vision.  
40 *Frontiers Integr Neurosci*. **9**, 6 (2015).
- 41 46. T. Schenk, N. Mai, J. Ditterich, J. Zihl, Can a motion-blind patient reach for moving objects?  
42 *Eur J Neurosci*. **12**, 3351–3360 (2000).
- 43 47. D. Whitney, A. Ellison, N. J. Rice, D. Arnold, M. Goodale, V. Walsh, D. Milner, Visually  
44 Guided Reaching Depends on Motion Area MT+. *Cereb Cortex*. **17**, 2644–2649 (2007).
- 45 48. S. Pitzalis, M. I. Sereno, G. Committeri, P. Fattori, G. Galati, F. Patria, C. Galletti, Human  
46 V6: The Medial Motion Area. *Cereb Cortex*. **20**, 411–424 (2009).
- 47 49. A. S. Tolias, G. A. Keliris, S. M. Smirnakis, N. K. Logothetis, Neurons in macaque area V4  
48 acquire directional tuning after adaptation to motion stimuli. *Nat Neurosci*. **8**, 591–593 (2005).
- 49 50. L. H. Snyder, A. P. Batista, R. A. Andersen, Coding of intention in the posterior parietal  
50 cortex. *Nature*. **386**, 167–170 (1997).



- 51 51. F. Filimon, J. D. Nelson, R.-S. Huang, M. I. Sereno, Multiple Parietal Reach Regions in  
52 Humans: Cortical Representations for Visual and Proprioceptive Feedback during On-Line  
53 Reaching. *J Neurosci.* **29**, 2961–2971 (2009).
- 54 52. M. CHIANG, Use of Tools by Wild Macaque Monkeys in Singapore. *Nature.* **214**, 1258–  
55 1259 (1967).
- 56 53. C. Boesch, H. Boesch, Optimisation of Nut-Cracking With Natural Hammers By Wild  
57 Chimpanzees. *Behaviour.* **83**, 265–286 (1983).
- 58 54. H. Rodman, C. Gross, T. Albright, Afferent basis of visual response properties in area MT of  
59 the macaque. I. Effects of striate cortex removal. *J Neurosci.* **9**, 2033–2050 (1989).
- 60 55. J. H. Kaas, L. A. Krubitzer, Area 17 lesions deactivate area MT in owl monkeys. *Visual*  
61 *Neurosci.* **9**, 399–407 (1992).
- 62 56. H.-H. Yu, T. A. Chaplin, G. W. Egan, D. H. Reser, K. H. Worthy, M. G. P. Rosa, Visually  
63 Evoked Responses in Extrastriate Area MT after Lesions of Striate Cortex in Early Life. *J*  
64 *Neurosci.* **33**, 12479 (2013).
- 65 57. F. Tretter, M. Cynader, W. Singer, Modification of direction selectivity of neurons in the  
66 visual cortex of kittens. *Brain Res.* **84**, 143–149 (1975).
- 67 58. T. Pasternak, L. Leinen, Pattern and motion vision in cats with selective loss of cortical  
68 directional selectivity. *J Neurosci.* **6**, 938–945 (1986).
- 69 59. A. Kohn, J. A. Movshon, Adaptation changes the direction tuning of macaque MT neurons.  
70 *Nat Neurosci.* **7**, 764–772 (2004).

- 71 60. J. F. M. V. Brederode, K. A. Mulligan, A. E. Hendrickson, Calcium-binding proteins as  
72 markers for subpopulations of GABAergic neurons in monkey striate cortex. *J Comp Neurology*.  
73 **298**, 1–22 (1990).
- 74 61. F. V. Gomes, X. Zhu, A. A. Grace, Stress during critical periods of development and risk for  
75 schizophrenia. *Schizophr Res*. **213**, 107–113 (2019).
- 76 62. S.-H. Lee, A. C. Kwan, S. Zhang, V. Phoumthippavong, J. G. Flannery, S. C. Masmanidis,  
77 H. Taniguchi, Z. J. Huang, F. Zhang, E. S. Boyden, K. Deisseroth, Y. Dan, Activation of specific  
78 interneurons improves V1 feature selectivity and visual perception. *Nature*. **488**, 379–383 (2012).
- 79 63. C. A. Runyan, J. Schummers, A. V. Wart, S. J. Kuhlman, N. R. Wilson, Z. J. Huang, M. Sur,  
80 Response Features of Parvalbumin-Expressing Interneurons Suggest Precise Roles for Subtypes  
81 of Inhibition in Visual Cortex. *Neuron*. **67**, 847–857 (2010).
- 82 64. Y. Yamazaki, C. Echigo, M. Saiki, M. Inada, S. Watanabe, A. Iriki, Tool-use learning by  
83 common marmosets (*Callithrix jacchus*). *Exp Brain Res*. **213**, 63–71 (2011).
- 84 65. I.-C. Mundinano, P. A. Flecknell, J. A. Bourne, MRI-guided stereotaxic brain surgery in the  
85 infant and adult common marmoset. *Nat Protoc*. **11**, 1299–1308 (2016).
- 86 66. A. Woodward, T. Hashikawa, M. Maeda, T. Kaneko, K. Hikishima, A. Iriki, H. Okano, Y.  
87 Yamaguchi, The Brain/MINDS 3D digital marmoset brain atlas. *Sci Data*. **5**, 180009 (2018).
- 88 67. J. A. Bourne, M. G. P. Rosa, Preparation for the in vivo recording of neuronal responses in the  
89 visual cortex of anaesthetised marmosets (*Callithrix jacchus*). *Brain Research Protocols*. **11**,  
90 168–177 (2003).

- 91 68. K. A. Fritsches, M. G. P. Rosa, Visuotopic organisation of striate cortex in the marmoset  
92 monkey (*Callithrix jacchus*). *J Comp Neurology*. **372**, 264–282 (1996).
- 93 69. H.-H. Yu, R. Verma, Y. Yang, H. A. Tibballs, L. L. Lui, D. H. Reser, M. G. P. Rosa, Spatial  
94 and temporal frequency tuning in striate cortex: functional uniformity and specializations related  
95 to receptive field eccentricity. *Eur J Neurosci*. **31**, 1043–1062 (2010).
- 96 70. F. Gallyas, Silver Staining of Myelin by Means of Physical Development. *Neurol Res*. **1**, 203–  
97 209 (1979).
- 98 71. J. Schindelin, I. Arganda-Carreras, E. Frise, V. Kaynig, M. Longair, T. Pietzsch, S. Preibisch,  
99 C. Rueden, S. Saalfeld, B. Schmid, J.-Y. Tinevez, D. J. White, V. Hartenstein, K. Eliceiri, P.  
00 Tomancak, A. Cardona, Fiji: an open-source platform for biological-image analysis. *Nat Methods*.  
01 **9**, 676–682 (2012).

02

03

04 **Acknowledgments**

05 The authors would like to acknowledge and thank D.A. Leopold who read through earlier  
06 versions of the manuscript and M.J. de Souza for technical assistance and Qi Zhu Wu for MRI  
07 acquisition and DTI preprocessing.

08

09 **Funding:**

10 This work was supported by National Health and Medical Research Council (NHMRC) Project  
11 Grant APP1042893. W.C.K is supported by NHMRC Dora Lush Postgraduate Scholarship  
12 APP1190007. J.A.B is supported by NHMRC Senior Research Fellowship APP1077677. The  
13 Australian Regenerative Medicine Institute is supported by grants from the State Government of  
14 Victoria and the Australian Government.

15

16 **Author Contributions:**

17 W.C.K. and J.A.B. conceived and designed the research. W.C.K., C-K.C., H-H.Y., I-C.M. and  
18 J.A.B. designed the experiments. W.C.K., I-C.M., D.M.F, J.A.B. performed the MT ablation  
19 surgeries. C-K.C., W.C.K., and D.M.F performed the behavioural experiments. C-K.C and D.M.F  
20 analyzed the behavioural data. W.C.K., I-C.M., H-H.Y., J-H.L., J.A.B performed the  
21 electrophysiology experiments. I-C.M. analyzed the MRI data. W.C.K performed all tissue  
22 processing, immunolabelling and cell counts. W.C.K., C-K.C., H-H.Y. and J.A.B. wrote the  
23 paper.

24

25 **Competing interests:** The authors declare that they have no competing interests

26

27 **Data and materials availability:** All data that supports the findings of this study are available  
28 from the authors on reasonable request. See author contributions for specific datasets.
